# Supplementary material for: Linking global terrestrial and ocean biogeochemistry with process-based, coupled freshwater algae–nutrient–solid dynamics in LM3-FANSY v1.0
Source: Copernicus journal article supplement (doi:10.5194/gmd-17-5191-2024), 2024-07-08
Supplement: Supplementary file 1 [file gmd-17-5191-2024-supplement.zip]

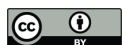

## *Supplement of*

# **Linking global terrestrial and ocean biogeochemistry with process-based, coupled freshwater algae–nutrient–solid dynamics in LM3-FANSY v1.0**

**Minjin Lee et al.**

*Correspondence to:* Minjin Lee (minjinl@princeton.edu)

- gmd-17-5191-2024-supplement-title-page.pdf
- supplement
  - BasinSlope.nc
  - LAI.nc
  - Lee et al\_SI.pdf
  - Rainfall.nc
  - RiverDINLoads.nc
  - RiverDINYields.nc
  - RiverDONLoads.nc
  - RiverDONYields.nc
  - RiverDOPLoads.nc
  - RiverDOPYields.nc
  - RiverPO4Loads.nc
  - RiverPO4Yields.nc
  - RiverPONLoads.nc
  - RiverPONYields.nc
  - RiverPPLoads.nc
  - RiverPPYields.nc
  - RiverSSLoads.nc
  - RiverSSYields.nc
  - SoilErosion.nc
  - readme.txt
  - supplement.xlsx

The copyright of individual parts of the supplement might differ from the article licence.
