# Supplementary material for: Linking global terrestrial and ocean biogeochemistry with process-based, coupled freshwater algae–nutrient–solid dynamics in LM3-FANSY v1.0
Source: Copernicus journal article supplement (doi:10.5194/gmd-17-5191-2024), 2024-07-08
Supplement: Supplementary file 2 [file gmd-17-5191-2024-supplement.zip]

Table S1. Reported basin area, river discharge, and suspended solids (SS) for 65 rivers (Meybeck and Ragu, 2012; Mayorga et al., 2010).

|                | Meybeck and Ragu (2012)       |                                               |                               | Global NEWS 2; Mayorga et al. (2010) |                                               |                                                   |                                 |
|----------------|-------------------------------|-----------------------------------------------|-------------------------------|--------------------------------------|-----------------------------------------------|---------------------------------------------------|---------------------------------|
| River          | Basin Area<br>km <sup>2</sup> | Discharge<br>km <sup>3</sup> yr <sup>-1</sup> | SS Conc<br>mg l <sup>-1</sup> | Basin Area<br>km <sup>2</sup>        | Discharge<br>km <sup>3</sup> yr <sup>-1</sup> | SS Yields<br>Mg km <sup>-2</sup> yr <sup>-1</sup> | SS Loads<br>Mg yr <sup>-1</sup> |
| Amazon         | 6112000                       | 6590                                          | 182.1                         | 5846870                              | 6444.09                                       | 74                                                | 435355602                       |
| Zaire          | 3698000                       | 1200                                          | 19                            | 3694430                              | 1278.28                                       | 8                                                 | 30474848                        |
| Ob             | 2990000                       | 404                                           | 40.8                          | 3022320                              | 392.97                                        | 11                                                | 32408854                        |
| Mississippi    | 2980000                       | 580                                           | 862.1                         | 3199170                              | 620.03                                        | 16                                                | 50447046                        |
| Nile           | 2870000                       | 83.2                                          | 1442                          | 3821590                              | 347.84                                        | 1                                                 | 3965538                         |
| Parana         | 2783000                       | 568                                           | 139.1                         | 2660890                              | 558.85                                        | 13                                                | 35825104                        |
| Yenisey        | 2590000                       | 620                                           | 9.5                           | 2575660                              | 596.33                                        | 12                                                | 29934161                        |
| Lena           | 2490000                       | 533                                           | 33                            | 2438900                              | 480.54                                        | 22                                                | 52914080                        |
| Amur           | 1855000                       | 344                                           | 72.4                          | 1752600                              | 337.59                                        | 14                                                | 24698441                        |
| Chang Jiang    | 1808000                       | 928                                           | 517                           | 1792120                              | 905.28                                        | 92                                                | 164644614                       |
| Mackenzie      | 1787000                       | 321.5                                         | 134.4                         | 1692900                              | 289.51                                        | 24                                                | 41025668                        |
| Zambezi        | 1330000                       | 106                                           | 188.7                         | 1361960                              | 309.43                                        | 12                                                | 16721397                        |
| Niger          | 1200000                       | 154.1                                         | 259.5                         | 2237360                              | 324.77                                        | 11                                                | 23939573                        |
| Orinoco        | 1100000                       | 1135                                          | 132.2                         | 1038130                              | 1115.14                                       | 51                                                | 53155946                        |
| Murray         | 1060000                       | 23.6                                          | 1271.2                        | 1030290                              | 6.6                                           | 9                                                 | 9558272                         |
| Ganges         | 1050000                       | 493                                           | 1055                          | 1626470                              | 1143.76                                       | 2029                                              | 3299693147                      |
| Saint Lawrence | 1020000                       | 341                                           | 11.7                          | 1052470                              | 354.84                                        | 2                                                 | 2566071                         |
| Huang He/Haiho | 1009000                       | 133                                           | 58997                         |                                      |                                               |                                                   |                                 |
| Orange         | 1000000                       | 11.36                                         | 7834.5                        | 942459                               | 11.49                                         | 6                                                 | 5450726                         |
| Indus          | 916000                        | 90                                            | 2778                          |                                      |                                               |                                                   |                                 |
| Rio Grande     | 870000                        | 18                                            | 1111.1                        |                                      |                                               |                                                   |                                 |
| Yukon          | 849000                        | 201                                           | 300                           | 854690                               | 90.3                                          | 49                                                | 41871742                        |
| Danube         | 817000                        | 203                                           | 335                           | 787069                               | 200.19                                        | 29                                                | 22977561                        |
| Mekong         | 795000                        | 467                                           | 321.2                         | 757660                               | 433.3                                         | 488                                               | 369763372                       |
| Tocantins      | 757000                        | 372                                           | 201.6                         | 767705                               | 383.38                                        | 6                                                 | 4320806                         |
| Columbia       | 669000                        | 236                                           | 63.6                          | 731105                               | 240.44                                        | 39                                                | 28487027                        |
| Kolyma         | 660000                        | 128                                           | 125.8                         | 664851                               | 104.13                                        | 11                                                | 7281072                         |
| Colorado       | 639000                        | 18.5                                          | 6487                          | 806617                               | 19.03                                         | 2                                                 | 1388732                         |
| Sao Francisco  | 630000                        | 90                                            | 66.7                          | 614418                               | 86.59                                         | 2                                                 | 1114044                         |
| Brahmaputra    | 580000                        | 644                                           | 1058.8                        |                                      |                                               |                                                   |                                 |
| Shatt el Arab  | 541300                        | 47.75                                         | 2295                          |                                      |                                               |                                                   |                                 |
| Dnepr          | 504000                        | 53.6                                          | 42.9                          | 508234                               | 46.94                                         | 1                                                 | 272098                          |
| Senegal        | 441000                        | 24.4                                          | 77.9                          | 846269                               | 24.91                                         | 4                                                 | 3706404                         |
| Limpopo        | 440000                        | 26                                            | 1269                          | 419839                               | 8.38                                          | 18                                                | 7682071                         |
| Zhujiang       | 437000                        | 363                                           | 190.1                         | 408043                               | 259.51                                        | 68                                                | 27671181                        |
| Irrawaddy      | 410000                        | 486                                           | 535                           | 405481                               | 619.15                                        | 1325                                              | 537116394                       |
| Volta          | 394000                        | 36.8                                          | 516.3                         | 397598                               | 25.66                                         | 3                                                 | 1019136                         |
| Khatanga       | 364000                        | 101                                           | 16.8                          | 369915                               | 34.37                                         | 18                                                | 6831070                         |

|                  |        |      |        |        |        |     |           |
|------------------|--------|------|--------|--------|--------|-----|-----------|
| Indigirka        | 362000 | 53.6 | 240.7  | 333729 | 50.42  | 14  | 4707765   |
| N. Dvina         | 348000 | 105  | 42.9   | 360513 | 107.83 | 10  | 3489082   |
| Pechora          | 324000 | 129  | 50.4   | 313916 | 142.41 | 13  | 3990446   |
| Godavari/Krishna | 572000 | 135  | 1733.2 | 562591 | 131.59 | 116 | 65435724  |
| Neva             | 282000 | 78.5 | 10.4   | 284166 | 78.87  | 3   | 901953    |
| Uruguay          | 240000 | 145  | 75.9   |        |        |     |           |
| Magdalena        | 235000 | 237  | 928.3  | 251445 | 236.03 | 284 | 71407661  |
| Yana             | 230800 | 30.6 | 114.4  | 224724 | 32.45  | 14  | 3239635   |
| Rhine            | 224000 | 69.4 | 49.1   | 164864 | 72.83  | 4   | 698447    |
| Fraser           | 220000 | 114  | 175.4  | 237222 | 102.49 | 52  | 12372746  |
| Liao             | 219000 | 16.2 | 2531   | 273728 | 5.92   | 7   | 1821819   |
| Olenek           | 219000 | 13.9 | 32     | 222924 | 32.47  | 15  | 3308073   |
| Anadyr           | 200000 | 63.7 | 28.3   | 225578 | 37.02  | 9   | 2029997   |
| Wisla            | 198000 | 34.1 | 73.3   | 180368 | 32.83  | 13  | 2354478   |
| Rufiji           | 178000 | 35.2 | 483    | 186538 | 28.6   | 157 | 29244750  |
| Essequibo        | 164000 | 178  | 25.3   | 150591 | 140.17 | 66  | 9959167   |
| Elbe             | 146000 | 23.7 | 35.4   | 148353 | 26.68  | 7   | 1000150   |
| Mahanadi         | 141600 | 66   | 909.1  | 141040 | 51.73  | 135 | 18984547  |
| Albany/Moose     | 243000 | 90.2 | 63.2   | 243225 | 74.82  | 5   | 1263157   |
| Kuskokwim        | 123000 | 59.9 | 116.9  | 115670 | 40.73  | 32  | 3689266   |
| Hong (Red)       | 120000 | 123  | 1057   | 170700 | 67.96  | 783 | 133718671 |
| Brazos/Colorado  | 221000 | 7.53 | 4502   | 245926 | 12.75  | 11  | 2804187   |
| Mobile           | 113000 | 59.9 | 75     |        |        |     |           |
| Odra             | 112000 | 18.3 | 7.1    | 119703 | 18.58  | 5   | 560380    |
| Chao Phrya       | 111400 | 27.8 | 395.7  | 141662 | 17.09  | 55  | 7795036   |
| Bandama          | 105000 | 11.5 | 102.6  | 103965 | 25.85  | 32  | 3309928   |
| Taz              | 100000 | 48.5 | 18.6   | 170827 | 42.58  | 8   | 1435669   |

Table S2. Reported basin area, river discharge, and nitrate N (NO<sub>3</sub><sup>-</sup>) for 51 rivers (Meybeck and Ragu, 2012).

| River            | Basin Area, km <sup>2</sup> | River Discharge, km <sup>3</sup> yr <sup>-1</sup> | NO <sub>3</sub> <sup>-</sup> , mg l <sup>-1</sup> |
|------------------|-----------------------------|---------------------------------------------------|---------------------------------------------------|
| Amazon           | 6112000                     | 6590                                              | 0.14                                              |
| Zaire            | 3698000                     | 1283                                              | 0.08                                              |
| Ob               | 2990000                     | 404                                               | 0.06                                              |
| Mississippi      | 2980000                     | 580                                               | 1.4                                               |
| Parana           | 2783000                     | 568                                               | 0.165                                             |
| Yenisey          | 2590000                     | 620                                               | 0.02                                              |
| Lena             | 2490000                     | 533                                               | 0.03                                              |
| Amur             | 1855000                     | 344                                               | 0.02                                              |
| Chang Jiang      | 1808000                     | 928                                               | 0.319                                             |
| Mackenzie        | 1787000                     | 321.5                                             | 0.053                                             |
| Zambezi          | 1330000                     | 106                                               | 0.13                                              |
| Nelson           | 1132000                     | 83.3                                              | 0.012                                             |
| Orinoco          | 1100000                     | 1135                                              | 0.08                                              |
| Murray           | 1060000                     | 23.6                                              | 0.11                                              |
| Saint Lawrence   | 1020000                     | 341                                               | 0.16                                              |
| Orange           | 1000000                     | 11.36                                             | 0.72                                              |
| Indus            | 916000                      | 90                                                | 2                                                 |
| Rio Grande       | 870000                      | 18                                                | 0.15                                              |
| Yukon            | 849000                      | 201                                               | 0.1                                               |
| Danube           | 817000                      | 203                                               | 1.8                                               |
| Tocantins        | 757000                      | 372                                               | 0.015                                             |
| Huang He         | 752000                      | 41                                                | 2.2                                               |
| Columbia         | 669000                      | 236                                               | 0.2                                               |
| Kolyma           | 660000                      | 128                                               | 0.04                                              |
| Colorado         | 639000                      | 18.5                                              | 0.35                                              |
| Godavari/Krishna | 572000                      | 135                                               | 0.17                                              |
| Dnepr            | 504000                      | 53.6                                              | 0.21                                              |
| Zhujiang         | 437000                      | 363                                               | 0.62                                              |
| Volta            | 394000                      | 36.8                                              | 0.15                                              |
| Khatanga         | 364000                      | 101                                               | 0.03                                              |
| Indigirka        | 362000                      | 53.6                                              | 0.024                                             |
| N. Dvina         | 348000                      | 105                                               | 0.02                                              |
| Churchill        | 298000                      | 40                                                | 0.01                                              |
| Neva             | 282000                      | 78.5                                              | 0.23                                              |
| Pechora          | 248000                      | 110                                               | 0.07                                              |
| Magdalena        | 240900                      | 214.5                                             | 0.22                                              |
| Uruguay          | 240000                      | 145                                               | 0.226                                             |
| Yana             | 230800                      | 30.6                                              | 0.01                                              |
| Rhine            | 224000                      | 69.4                                              | 3.9                                               |
| Brazos/Colorado  | 221000                      | 7.53                                              | 0.42                                              |
| Fraser           | 220000                      | 114                                               | 0.099                                             |

|            |        |      |       |
|------------|--------|------|-------|
| Liao       | 219000 | 16.2 | 0.105 |
| Olenek     | 219000 | 13.9 | 0.03  |
| Wisla      | 198000 | 34.1 | 1.83  |
| Rufiji     | 178000 | 35.2 | 1.3   |
| Elbe       | 146000 | 23.7 | 3.6   |
| Mobile     | 113000 | 59.9 | 0.26  |
| Balsas     | 112000 | 14   | 0.19  |
| Loire      | 112000 | 28.4 | 1.7   |
| Odra       | 112000 | 18.3 | 2.42  |
| Chao Phrya | 111400 | 27.8 | 0.14  |

Table S3. Reported basin area, river discharge, and ammonium N (NH<sub>4</sub><sup>+</sup>) for 37 rivers (Meybeck and Ragu, 2012).

| River          | Basin Area, km <sup>2</sup> | River Discharge, km <sup>3</sup> yr <sup>-1</sup> | NH <sub>4</sub> <sup>+</sup> , mg l <sup>-1</sup> |
|----------------|-----------------------------|---------------------------------------------------|---------------------------------------------------|
| Amazon         | 6112000                     | 6590                                              | 0.02                                              |
| Zaire          | 3698000                     | 1200                                              | 0.007                                             |
| Ob             | 2990000                     | 404                                               | 0.6                                               |
| Mississippi    | 2980000                     | 580                                               | 0.04                                              |
| Parana         | 2783000                     | 568                                               | 0.05                                              |
| Yenisey        | 2590000                     | 620                                               | 0.28                                              |
| Lena           | 2490000                     | 533                                               | 0.08                                              |
| Amur           | 1855000                     | 344                                               | 0.43                                              |
| Chang Jiang    | 1808000                     | 928                                               | 0.319                                             |
| Zambezi        | 1200000                     | 223                                               | 0.014                                             |
| Orinoco        | 1100000                     | 1135                                              | 0.035                                             |
| Murray         | 1060000                     | 23.6                                              | 0.036                                             |
| Saint Lawrence | 1020000                     | 341                                               | 0.08                                              |
| Indus          | 916000                      | 90                                                | 0.2                                               |
| Rio Grande     | 870000                      | 18                                                | 0.03                                              |
| Yukon          | 849000                      | 201                                               | 0.03                                              |
| Huang He       | 752000                      | 41                                                | 0.01                                              |
| Columbia       | 669000                      | 236                                               | 0.01                                              |
| Kolyma         | 660000                      | 128                                               | 0.05                                              |
| Zhujiang       | 437000                      | 363                                               | 0.01                                              |
| Khatanga       | 364000                      | 101                                               | 0.04                                              |
| Indigirka      | 362000                      | 53.6                                              | 0.004                                             |
| N. Dvina       | 348000                      | 105                                               | 0.12                                              |
| Pechora        | 324000                      | 129                                               | 0.22                                              |
| Churchill      | 298000                      | 40                                                | 0.1                                               |
| Neva           | 282000                      | 78.5                                              | 0.03                                              |
| Uruguay        | 240000                      | 145                                               | 0.05                                              |
| Yana           | 230800                      | 30.6                                              | 0.17                                              |
| Rhine          | 224000                      | 69.4                                              | 0.9                                               |
| Liao           | 219000                      | 16.2                                              | 0.175                                             |
| Olenek         | 219000                      | 13.9                                              | 0.05                                              |
| Wisla          | 198000                      | 34.1                                              | 0.435                                             |
| Rufiji         | 178000                      | 35.2                                              | 0.095                                             |
| Elbe           | 146000                      | 23.7                                              | 1.3                                               |
| Balsas         | 112000                      | 14                                                | 0.395                                             |
| Odra           | 112000                      | 18.3                                              | 0.21                                              |
| Chao Phrya     | 111400                      | 27.8                                              | 0.1                                               |

Table S4. Reported basin area, river discharge, and dissolved organic nitrogen (DON) for 18 rivers (Meybeck and Ragu, 2012; Mayorga et al., 2010).

|                | Meybeck and Ragu (2012)       |                                               |                                | Global NEWS 2; Mayorga et al. (2010) |                                               |                                                    |                                  |
|----------------|-------------------------------|-----------------------------------------------|--------------------------------|--------------------------------------|-----------------------------------------------|----------------------------------------------------|----------------------------------|
| River          | Basin Area<br>km <sup>2</sup> | Discharge<br>km <sup>3</sup> yr <sup>-1</sup> | DON Conc<br>mg l <sup>-1</sup> | Basin Area<br>km <sup>2</sup>        | Discharge<br>km <sup>3</sup> yr <sup>-1</sup> | DON Yields<br>kg km <sup>-2</sup> yr <sup>-1</sup> | DON Loads<br>Mg yr <sup>-1</sup> |
| Amazon         | 6112000                       | 6590                                          | 0.162                          | 5846870                              | 6444                                          | 7061                                               | 306.4                            |
| Zaire          | 3698000                       | 1200                                          | 0.18                           | 3694430                              | 1278                                          | 1278                                               | 102.2                            |
| Nile           | 2870000                       | 83.2                                          | 0.01                           | 3821590                              | 348                                           | 356                                                | 0.1                              |
| Parana         | 2783000                       | 568                                           | 0.08                           | 2660890                              | 559                                           | 559                                                | 71.9                             |
| Lena           | 2490000                       | 533                                           | 0.46                           | 2438900                              | 481                                           | 485                                                | 58.9                             |
| Mackenzie      | 1787000                       | 321.5                                         | 0.1                            | 1692900                              | 290                                           | 270                                                | 47.6                             |
| Niger          | 1200000                       | 154.1                                         | 0.13                           | 2237360                              | 325                                           | 332                                                | 46.2                             |
| Orinoco        | 1100000                       | 1135                                          | 0.16                           | 1038130                              | 1115                                          | 1116                                               | 303.6                            |
| Ganges         | 1050000                       | 493                                           | 0.063                          | 1626470                              | 1144                                          | 1396                                               | 230.0                            |
| Saint Lawrence | 1020000                       | 341                                           | 0.03                           | 1052470                              | 355                                           | 355                                                | 117.3                            |
| Orange         | 1000000                       | 11.36                                         | 0.15                           | 942459                               | 11                                            | 12                                                 | 6.2                              |
| Danube         | 817000                        | 203                                           | 0.6                            | 787069                               | 200                                           | 211                                                | 106.4                            |
| Kolyma         | 660000                        | 128                                           | 0.35                           | 664851                               | 104                                           | 104                                                | 48.1                             |
| Brahmaputra    | 580000                        | 510                                           | 0.042                          |                                      |                                               |                                                    |                                  |
| Khatanga       | 364000                        | 101                                           | 0.41                           | 369915                               | 34                                            | 34                                                 | 24.6                             |
| Indigirka      | 362000                        | 53.6                                          | 0.35                           | 333729                               | 50                                            | 50                                                 | 46.4                             |
| Yana           | 230800                        | 30.6                                          | 0.4                            | 224724                               | 32                                            | 32                                                 | 44.2                             |
| Olenek         | 219000                        | 13.9                                          | 0.41                           | 222924                               | 32                                            | 33                                                 | 44.8                             |

Table S5. Reported basin area, river discharge, and total Kjeldahl N (TKN, the sum of  $\text{NH}_4^+$ , DON, and PON) concentration for 12 rivers (Meybeck and Ragu, 2012).

| River          | Basin Area, $\text{km}^2$ | River Discharge, $\text{km}^3 \text{yr}^{-1}$ | TKN, $\text{mg l}^{-1}$ |
|----------------|---------------------------|-----------------------------------------------|-------------------------|
| Mississippi    | 2980000                   | 580                                           | 1                       |
| Nelson         | 1132000                   | 83.3                                          | 1                       |
| Murray         | 1060000                   | 23.6                                          | 0.83                    |
| Saint Lawrence | 1020000                   | 341                                           | 0.24                    |
| Rio Grande     | 870000                    | 18                                            | 1                       |
| Yukon          | 849000                    | 201                                           | 0.5                     |
| Columbia       | 669000                    | 236                                           | 0.4                     |
| Churchill      | 298000                    | 40                                            | 0.6                     |
| Uruguay        | 240000                    | 145                                           | 0.45                    |
| Rhine          | 224000                    | 69.4                                          | 1.6                     |
| Balsas         | 112000                    | 14                                            | 0.89                    |
| Chao Phrya     | 111400                    | 27.8                                          | 0.28                    |

Table S6. Reported basin area, river discharge, and phosphate P ( $\text{PO}_4^{3-}$ ) for 47 rivers (Meybeck and Ragu, 2012; Mayorga et al., 2010).

|             | Meybeck and Ragu (2012)     |                                           |                                          | Global NEWS 2; Mayorga et al. (2010) |                                           |                                                                 |                                            |
|-------------|-----------------------------|-------------------------------------------|------------------------------------------|--------------------------------------|-------------------------------------------|-----------------------------------------------------------------|--------------------------------------------|
| River       | Basin Area<br>$\text{km}^2$ | Discharge<br>$\text{km}^3 \text{yr}^{-1}$ | $\text{PO}_4$ Conc<br>$\text{mg l}^{-1}$ | Basin Area<br>$\text{km}^2$          | Discharge<br>$\text{km}^3 \text{yr}^{-1}$ | $\text{PO}_4^{3-}$ Yields<br>$\text{kg km}^{-2} \text{yr}^{-1}$ | $\text{PO}_4$ Loads<br>$\text{Mg yr}^{-1}$ |
| Amazon      | 6112000                     | 6590                                      | 0.022                                    | 5846870                              | 6444                                      | 19.404                                                          | 113451                                     |
| Zaire       | 3698000                     | 1200                                      | 0.024                                    | 3694430                              | 1278                                      | 2.250                                                           | 8314                                       |
| Ob          | 2990000                     | 404                                       | 0.065                                    | 3199170                              | 620                                       | 8.563                                                           | 27396                                      |
| Mississippi | 2980000                     | 580                                       | 0.07                                     | 3022320                              | 393                                       | 4.687                                                           | 14164                                      |
| Parana      | 2783000                     | 568                                       | 0.045                                    | 2660890                              | 559                                       | 2.364                                                           | 6291                                       |
| Yenisey     | 2590000                     | 620                                       | 0.008                                    | 2575660                              | 596                                       | 0.633                                                           | 1631                                       |
| Lena        | 2490000                     | 533                                       | 0.004                                    | 2438900                              | 481                                       | 1.445                                                           | 3524                                       |
| Amur        | 1855000                     | 344                                       | 0.021                                    | 1752600                              | 338                                       | 7.090                                                           | 12426                                      |
| Chang Jiang | 1808000                     | 928                                       | 0.2                                      | 1792120                              | 905                                       | 51.316                                                          | 91964                                      |
| Mackenzie   | 1787000                     | 321.5                                     | 0.004                                    | 1692900                              | 290                                       | 0.762                                                           | 1290                                       |
| Zambezi     | 1330000                     | 106                                       | 0.01                                     | 1361960                              | 309                                       | 1.115                                                           | 1519                                       |
| Murray      | 1060000                     | 23.6                                      | 0.024                                    | 1030290                              | 7                                         | 0.319                                                           | 328                                        |
| Nelson      | 1132000                     | 83.3                                      | 0.004                                    | 1138420                              | 87                                        | 0.331                                                           | 376                                        |
| Orinoco     | 1100000                     | 1135                                      | 0.01                                     | 1038130                              | 1115                                      | 7.959                                                           | 8263                                       |
| Ganges      | 1050000                     | 493                                       | 0.075                                    | 1626470                              | 1144                                      | 101.905                                                         | 165745                                     |
| Indus       | 916000                      | 90                                        | 0.52                                     | 1141750                              | 52                                        | 1.110                                                           | 1267                                       |
| Rio Grande  | 870000                      | 18                                        | 0.03                                     | 803837                               | 3                                         | 0.056                                                           | 45                                         |
| Yukon       | 849000                      | 201                                       | 0.01                                     | 854690                               | 90                                        | 0.231                                                           | 198                                        |
| Danube      | 817000                      | 203                                       | 0.18                                     | 787069                               | 200                                       | 32.083                                                          | 25251                                      |
| Tocantins   | 757000                      | 372                                       | 0.003                                    | 767705                               | 383                                       | 3.144                                                           | 2414                                       |
| Huang He    | 752000                      | 41                                        | 0.02                                     | 892570                               | 31                                        | 2.367                                                           | 2113                                       |
| Columbia    | 669000                      | 236                                       | 0.014                                    | 731105                               | 240                                       | 1.258                                                           | 920                                        |
| Kolyma      | 660000                      | 128                                       | 0.009                                    | 664851                               | 104                                       | 0.852                                                           | 566                                        |
| Colorado    | 639000                      | 18.5                                      | 0.1                                      | 806617                               | 19                                        | 0.004                                                           | 3                                          |
| Brahmaputra | 580000                      | 510                                       | 0.06                                     |                                      |                                           |                                                                 |                                            |
| Dnepr       | 504000                      | 53.6                                      | 0.036                                    | 508234                               | 47                                        | 3.125                                                           | 1588                                       |
| Zhujiang    | 437000                      | 363                                       | 0.003                                    | 408043                               | 260                                       | 60.149                                                          | 24543                                      |
| Khatanga    | 364000                      | 101                                       | 0.006                                    | 369915                               | 34                                        | 0.256                                                           | 95                                         |
| Indigirka   | 362000                      | 53.6                                      | 0.006                                    | 333729                               | 50                                        | 0.794                                                           | 265                                        |
| N. Dvina    | 348000                      | 105                                       | 0.039                                    | 360513                               | 108                                       | 4.576                                                           | 1650                                       |
| Pechora     | 324000                      | 129                                       | 0.008                                    | 313916                               | 142                                       | 6.152                                                           | 1931                                       |
| Churchill   | 298000                      | 40                                        | 0.006                                    | 303135                               | 40                                        | 0.385                                                           | 117                                        |
| Neva        | 282000                      | 78.5                                      | 0.03                                     | 284166                               | 79                                        | 8.142                                                           | 2314                                       |
| Uruguay     | 240000                      | 145                                       | 0.037                                    |                                      |                                           |                                                                 |                                            |
| Magdalena   | 235000                      | 237                                       | 0.12                                     | 251445                               | 236                                       | 104.207                                                         | 26202                                      |
| Yana        | 230800                      | 30.6                                      | 0.001                                    | 224724                               | 32                                        | 0.719                                                           | 161                                        |
| Rhine       | 224000                      | 69.4                                      | 0.4                                      | 164864                               | 73                                        | 23.289                                                          | 3839                                       |
| Fraser      | 220000                      | 114                                       | 0.05                                     | 237222                               | 102                                       | 3.274                                                           | 777                                        |

|            |        |      |       |        |    |        |      |
|------------|--------|------|-------|--------|----|--------|------|
| Liao       | 219000 | 16.2 | 0.053 | 273728 | 6  | 11.272 | 3085 |
| Olenek     | 219000 | 13.9 | 0.003 | 222924 | 32 | 0.739  | 165  |
| Wisla      | 198000 | 34.1 | 0.21  | 180368 | 33 | 53.180 | 9592 |
| Rufiji     | 178000 | 35.2 | 0.01  | 186538 | 29 | 2.566  | 479  |
| Elbe       | 146000 | 23.7 | 0.39  | 148353 | 27 | 30.332 | 4500 |
| Balsas     | 112000 | 14   | 0.095 | 122842 | 28 | 21.418 | 2631 |
| Loire      | 112000 | 28.4 | 0.09  | 118141 | 29 | 36.059 | 4260 |
| Odra       | 112000 | 18.3 | 0.37  | 119703 | 19 | 40.555 | 4855 |
| Chao Phrya | 111400 | 27.8 | 0.026 | 141662 | 17 | 1.893  | 268  |

Table S7. Reported basin area, river discharge, and dissolved organic P (DOP) for 9 rivers (Meybeck and Ragu, 2012; Mayorga et al., 2010).

|           | Meybeck and Ragu (2012)       |                                               |                                | Global NEWS 2; Mayorga et al. (2010) |                                               |                                                    |                                  |
|-----------|-------------------------------|-----------------------------------------------|--------------------------------|--------------------------------------|-----------------------------------------------|----------------------------------------------------|----------------------------------|
| River     | Basin Area<br>km <sup>2</sup> | Discharge<br>km <sup>3</sup> yr <sup>-1</sup> | DOP Conc<br>mg l <sup>-1</sup> | Basin Area<br>km <sup>2</sup>        | Discharge<br>km <sup>3</sup> yr <sup>-1</sup> | DOP Yields<br>kg km <sup>-2</sup> yr <sup>-1</sup> | DOP Loads<br>Mg yr <sup>-1</sup> |
| Amazon    | 6112000                       | 6590                                          | 0.015                          | 5846870                              | 6444.1                                        | 16.6                                               | 96798.0                          |
| Lena      | 2490000                       | 533                                           | 0.022                          | 2438900                              | 480.5                                         | 3.1                                                | 7679.5                           |
| Orinoco   | 1100000                       | 1135                                          | 0.01                           | 1038130                              | 1115.1                                        | 16.5                                               | 17170.4                          |
| Danube    | 817000                        | 203                                           | 0.035                          | 787069                               | 200.2                                         | 4.7                                                | 3672.0                           |
| Kolyma    | 660000                        | 128                                           | 0.015                          | 664851                               | 104.1                                         | 2.6                                                | 1711.7                           |
| Khatanga  | 364000                        | 101                                           | 0.006                          | 369915                               | 34.4                                          | 1.3                                                | 487.0                            |
| Indigirka | 362000                        | 53.6                                          | 0.009                          | 333729                               | 50.4                                          | 2.5                                                | 830.3                            |
| Yana      | 230800                        | 30.6                                          | 0.01                           | 224724                               | 32.5                                          | 2.4                                                | 532.3                            |
| Olenek    | 219000                        | 13.9                                          | 0.006                          | 222924                               | 32.5                                          | 2.4                                                | 535.2                            |

Table S8. Reported basin area, river discharge, and total P (TP) for 5 rivers (Meybeck and Ragu, 2012; Mayorga et al., 2010).

|         | Meybeck and Ragu (2012)       |                                               |                               | Global NEWS 2; Mayorga et al. (2010) |                                               |                                                   |                                 |
|---------|-------------------------------|-----------------------------------------------|-------------------------------|--------------------------------------|-----------------------------------------------|---------------------------------------------------|---------------------------------|
| River   | Basin Area<br>km <sup>2</sup> | Discharge<br>km <sup>3</sup> yr <sup>-1</sup> | TP Conc<br>mg l <sup>-1</sup> | Basin Area<br>km <sup>2</sup>        | Discharge<br>km <sup>3</sup> yr <sup>-1</sup> | TP Yields<br>kg km <sup>-2</sup> yr <sup>-1</sup> | TP Loads<br>Mg yr <sup>-1</sup> |
| Amazon  | 6112000                       | 6590                                          | 0.24                          | 5846870                              | 6444                                          | 180                                               | 1052369                         |
| Parana  | 2783000                       | 568                                           | 1.1                           | 2660890                              | 559                                           | 21                                                | 55942                           |
| Nelson  | 1132000                       | 83.3                                          | 0.19                          | 1138420                              | 87                                            | 3                                                 | 3897                            |
| Orinoco | 1100000                       | 1135                                          | 0.06                          | 1038130                              | 1115                                          | 77                                                | 80187                           |
| Elbe    | 146000                        | 23.7                                          | 0.65                          | 148353                               | 27                                            | 50                                                | 7468                            |

Table S9. Reported basin area, river discharge, and dissolved inorganic N (DIN) for 37 rivers (Meybeck and Ragu, 2012; Mayorga et al., 2010).

| Meybeck and Ragu (2012) |                               |                                               |                                | Global NEWS 2; Mayorga et al. (2010) |                                               |                                                    |                                  |
|-------------------------|-------------------------------|-----------------------------------------------|--------------------------------|--------------------------------------|-----------------------------------------------|----------------------------------------------------|----------------------------------|
| River                   | Basin Area<br>km <sup>2</sup> | Discharge<br>km <sup>3</sup> yr <sup>-1</sup> | DIN Conc<br>mg l <sup>-1</sup> | Basin Area<br>km <sup>2</sup>        | Discharge<br>km <sup>3</sup> yr <sup>-1</sup> | DIN Yields<br>kg km <sup>-2</sup> yr <sup>-1</sup> | DIN Loads<br>Mg yr <sup>-1</sup> |
| Amazon                  | 6112000                       | 6590                                          | 0.16                           | 5846870                              | 6444                                          | 161                                                | 938617                           |
| Zaire                   | 3698000                       | 1200                                          | 0.097                          | 3694430                              | 1278                                          | 56                                                 | 208185                           |
| Ob                      | 2990000                       | 404                                           | 0.66                           | 3022320                              | 393                                           | 40                                                 | 119941                           |
| Mississippi             | 2980000                       | 580                                           | 1.44                           | 3199170                              | 620                                           | 213                                                | 680176                           |
| Parana                  | 2783000                       | 568                                           | 0.215                          | 2660890                              | 559                                           | 119                                                | 317108                           |
| Yenisey                 | 2590000                       | 620                                           | 0.3                            | 2575660                              | 596                                           | 28                                                 | 71285                            |
| Lena                    | 2490000                       | 533                                           | 0.11                           | 2438900                              | 481                                           | 21                                                 | 52053                            |
| Amur                    | 1855000                       | 344                                           | 0.45                           | 1752600                              | 338                                           | 101                                                | 176420                           |
| Chang Jiang             | 1808000                       | 928                                           | 0.638                          | 1792120                              | 905                                           | 1067                                               | 1912999                          |
| Zambezi                 | 1330000                       | 106                                           | 0.17                           | 1361960                              | 309                                           | 141                                                | 191808                           |
| Orinoco                 | 1100000                       | 1135                                          | 0.115                          | 1038130                              | 1115                                          | 277                                                | 287166                           |
| Murray                  | 1060000                       | 23.6                                          | 0.146                          | 1030290                              | 7                                             | 2                                                  | 2148                             |
| Saint Lawrence          | 1020000                       | 341                                           | 0.24                           | 1052470                              | 355                                           | 249                                                | 262331                           |
| Indus                   | 916000                        | 90                                            | 2.2                            | 1141750                              | 52                                            | 73                                                 | 83605                            |
| Rio Grande              | 870000                        | 18                                            | 0.18                           | 803837                               | 3                                             | 0                                                  | 17                               |
| Yukon                   | 849000                        | 201                                           | 0.13                           | 854690                               | 90                                            | 11                                                 | 9227                             |
| Huang He                | 752000                        | 41                                            | 2.21                           | 892570                               | 31                                            | 29                                                 | 26219                            |
| Columbia                | 669000                        | 236                                           | 0.21                           | 731105                               | 240                                           | 106                                                | 77857                            |
| Kolyma                  | 660000                        | 128                                           | 0.09                           | 664851                               | 104                                           | 22                                                 | 14822                            |
| Zhujiang                | 437000                        | 363                                           | 0.63                           | 408043                               | 260                                           | 1347                                               | 549488                           |
| Khatanga                | 364000                        | 101                                           | 0.07                           | 369915                               | 34                                            | 11                                                 | 4187                             |
| Indigirka               | 362000                        | 53.6                                          | 0.028                          | 333729                               | 50                                            | 25                                                 | 8348                             |
| N. Dvina                | 348000                        | 105                                           | 0.14                           | 360513                               | 108                                           | 205                                                | 73897                            |
| Pechora                 | 324000                        | 129                                           | 0.22                           | 313916                               | 142                                           | 94                                                 | 29664                            |
| Churchill               | 298000                        | 40                                            | 0.11                           | 303135                               | 40                                            | 10                                                 | 3043                             |
| Neva                    | 282000                        | 78.5                                          | 0.26                           | 284166                               | 79                                            | 169                                                | 47898                            |
| Uruguay                 | 240000                        | 145                                           | 0.276                          |                                      |                                               |                                                    |                                  |
| Yana                    | 230800                        | 30.6                                          | 0.18                           | 224724                               | 32                                            | 21                                                 | 4690                             |
| Rhine                   | 224000                        | 69.4                                          | 4.8                            | 164864                               | 73                                            | 913                                                | 150533                           |
| Liao                    | 219000                        | 16.2                                          | 0.28                           | 273728                               | 6                                             | 40                                                 | 10830                            |
| Olenek                  | 219000                        | 13.9                                          | 0.08                           | 222924                               | 32                                            | 11                                                 | 2518                             |
| Wisla                   | 198000                        | 34.1                                          | 2.265                          | 180368                               | 33                                            | 281                                                | 50685                            |
| Rufiji                  | 178000                        | 35.2                                          | 1.395                          | 186538                               | 29                                            | 52                                                 | 9627                             |
| Elbe                    | 146000                        | 23.7                                          | 4.9                            | 148353                               | 27                                            | 385                                                | 57153                            |
| Balsas                  | 112000                        | 14                                            | 0.585                          | 122842                               | 28                                            | 175                                                | 21504                            |
| Odra                    | 112000                        | 18.3                                          | 2.63                           | 119703                               | 19                                            | 244                                                | 29176                            |
| Chao Phrya              | 111400                        | 27.8                                          | 0.24                           | 141662                               | 17                                            | 71                                                 | 10102                            |

Table S10. Model sensitivities to the fractions of dividing TN and TP inputs into different N and P species (Table 3), examined based on the percentage (%) difference in global river loads between the sensitivity and baseline simulations for the year 1990.

|                                                                                 | SS | TN | DIN | DON | PON | TP | DIP | PIP | DOP | POP |
|---------------------------------------------------------------------------------|----|----|-----|-----|-----|----|-----|-----|-----|-----|
| Agricultural surface runoff (surficial runoff)                                  | 0  | 1  | 0   | 0   | 3   | 0  | -4  | -8  | 9   | 8   |
| Agricultural surface runoff (soil loss)                                         | 0  | -1 | 0   | 0   | -7  | 0  | 7   | 11  | -13 | -10 |
| Agricultural surface runoff (40% surficial runoff, 60% soil loss)               | 0  | 0  | 0   | 0   | -2  | 0  | 1   | 3   | -3  | -3  |
| Agricultural surface runoff (60% surficial runoff, 40% soil loss)               | 0  | 0  | 0   | 0   | 0   | 0  | -1  | -1  | 1   | 1   |
| Agricultural surface runoff (20% surficial runoff, 80% soil loss)               | 0  | -1 | 0   | 0   | -4  | 0  | 4   | 6   | -8  | -6  |
| Agricultural surface runoff (80% surficial runoff, 20% soil loss)               | 0  | 0  | 0   | 0   | 2   | 0  | -3  | -5  | 5   | 5   |
| Wastewater (untreated)                                                          | 0  | 0  | -3  | 1   | 7   | 0  | -9  | -1  | 6   | 6   |
| Wastewater (secondary/tertiary treated)                                         | 0  | 0  | -1  | 0   | 0   | 0  | 0   | 0   | 0   | 0   |
| Wastewater (80% untreated, 10% primary treated, 10% secondary/tertiary treated) | 0  | 0  | -3  | 1   | 5   | 0  | -7  | -1  | 4   | 5   |
| Wastewater (40% untreated, 40% primary treated, 20% secondary/tertiary treated) | 0  | 0  | -1  | 0   | 3   | 0  | -3  | -1  | 2   | 2   |

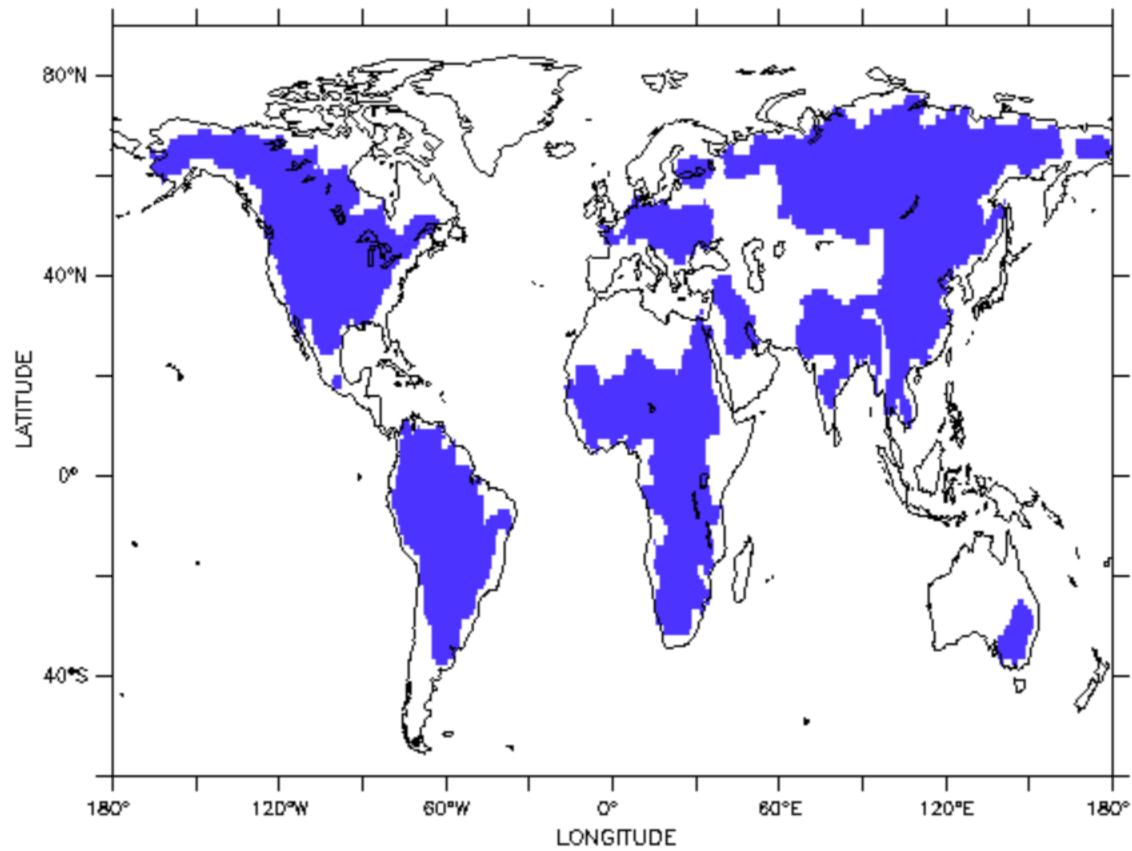

**Figure S1.** The 70 rivers considered for analyses are distributed broadly covering various climate and land use. The basin area of the 70 rivers covers 55% of global land area (excluding the Antarctic).

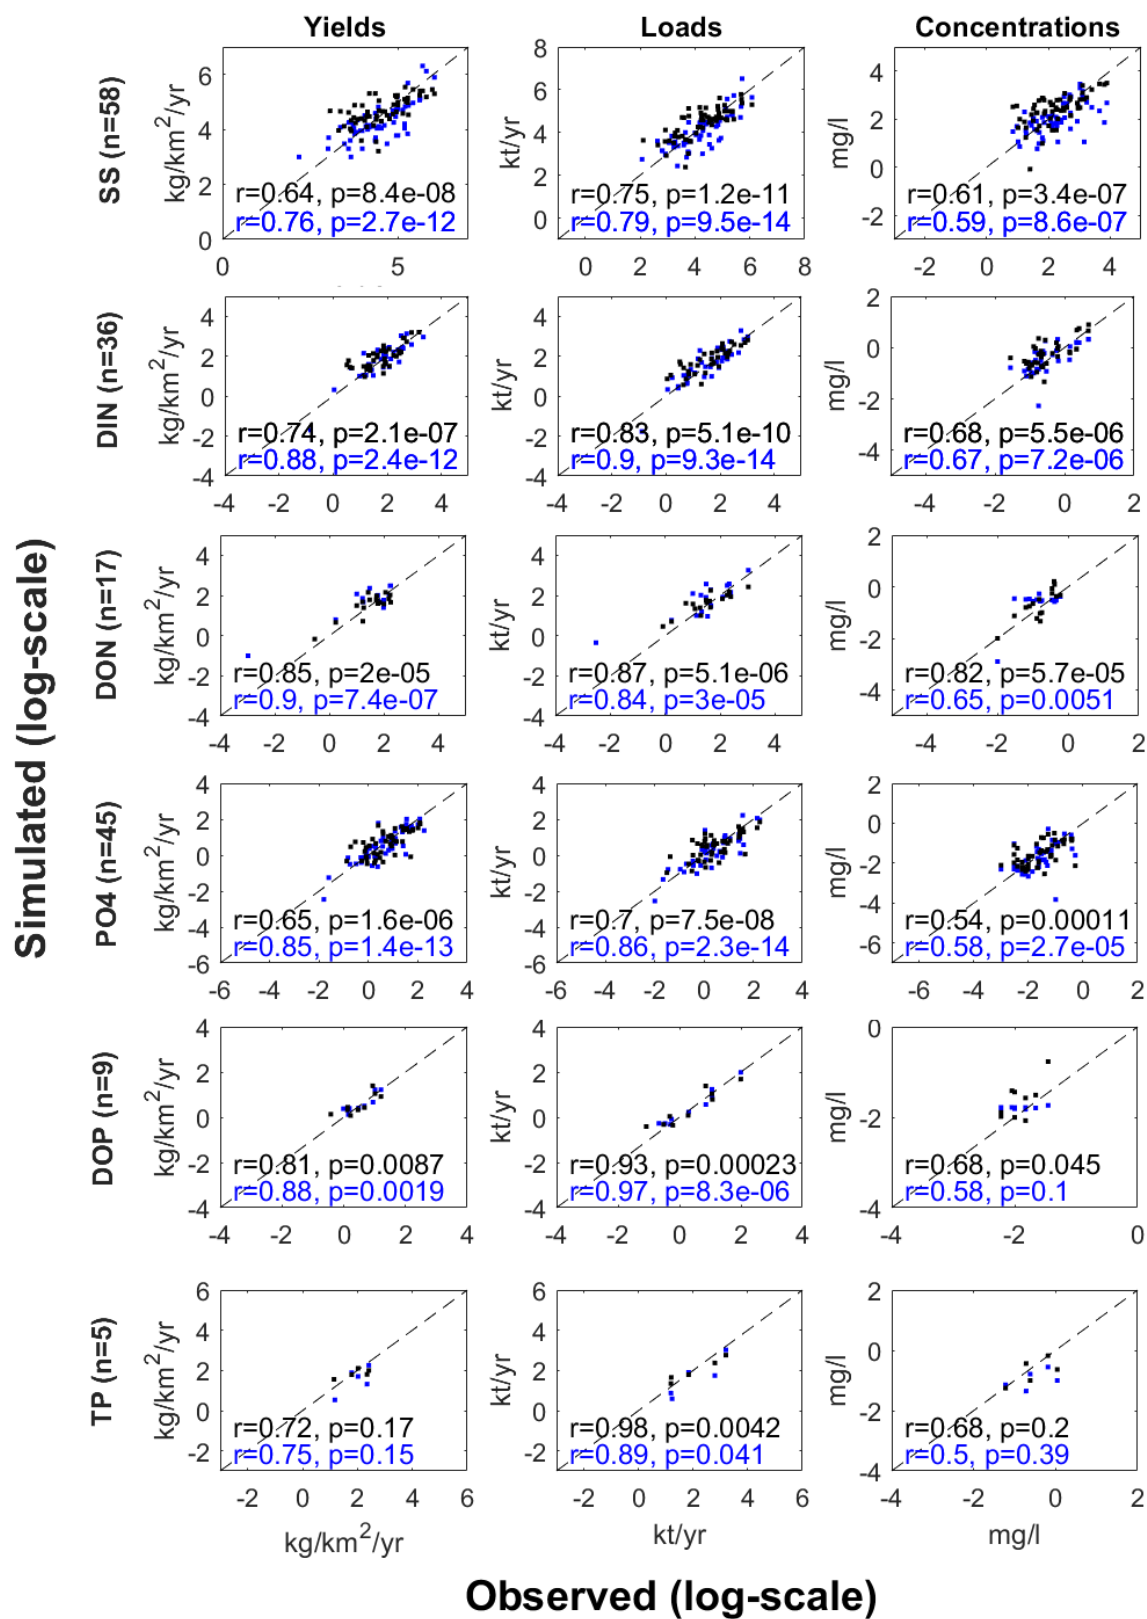

**Figure S2.** Pearson correlation coefficients ( $r$ ) and  $p$  values ( $p$ ) between log-transformed measurement-based vs. simulated SS, DIN, DON,  $\text{PO}_4^{3-}$ , DOP, and TP yields, loads, and concentrations for the year 1990. The color represents LM3-FANSY (black) and Global NEWS 2 (blue).

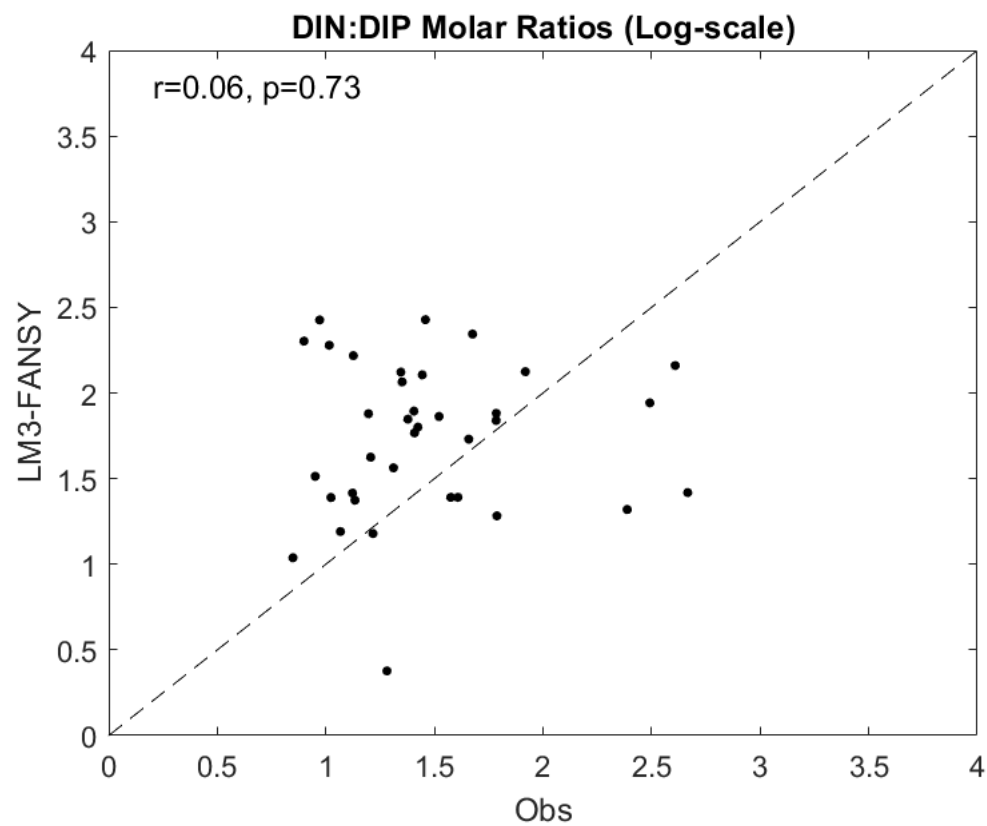

**Figure S3.** Pearson correlation coefficient ( $r$ ) and  $p$  value ( $p$ ) between the log-transformed measurement-based vs. simulated DIN:DIP molar ratios across 36 rivers for the year 1990.

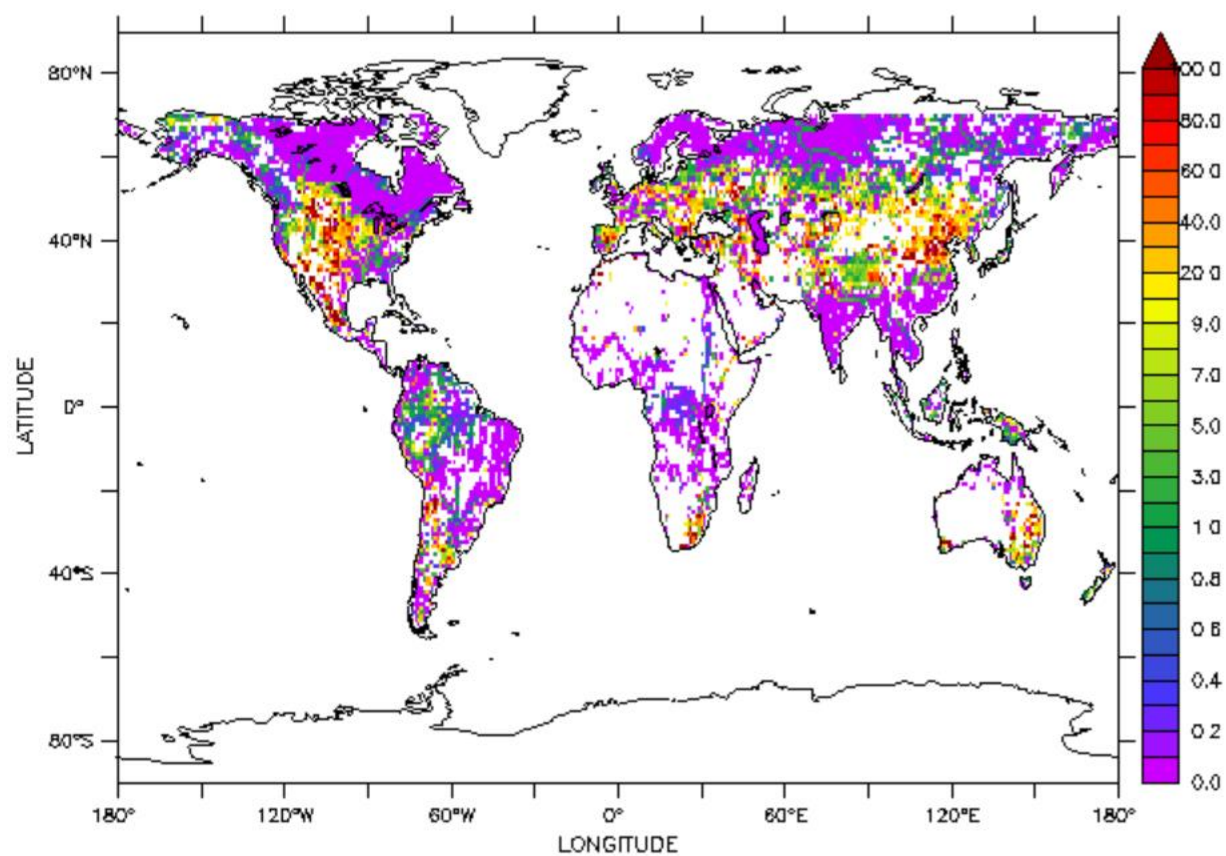

**Figure S4.** Chlorophyll-a concentrations ( $\text{mg m}^{-3}$ ) in lakes for the year 1990.

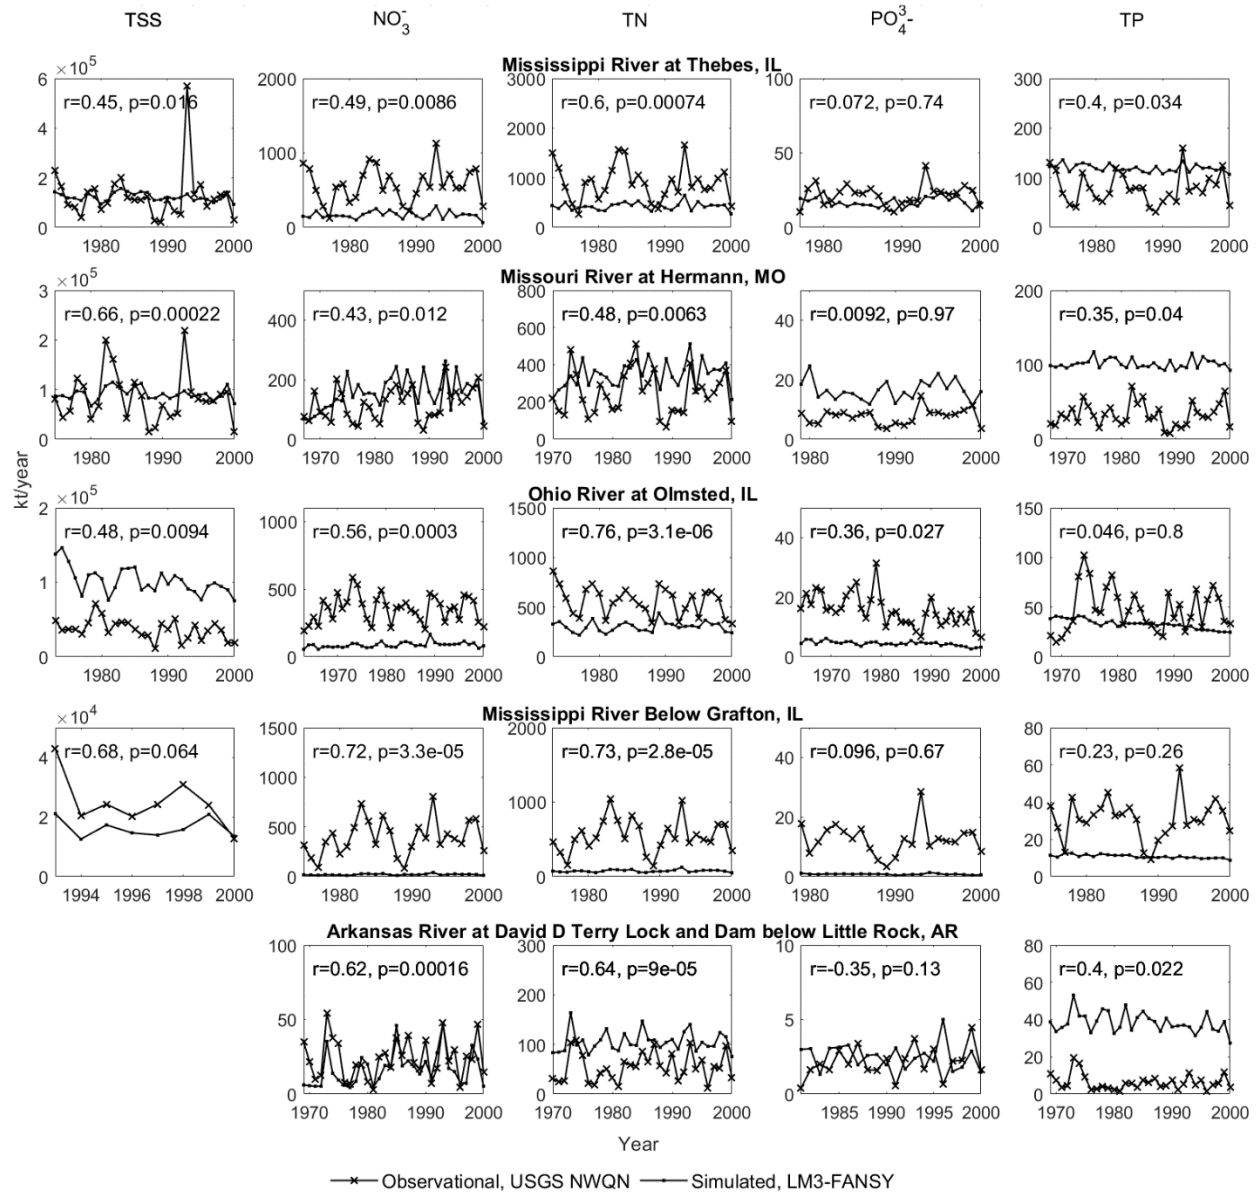

**Figure S5:** Pearson correlation coefficients (r) and p values (p) between the measurement-based vs. simulated annual loads across 5 stations in the Mississippi River Basin for the periods ~1963-2000.

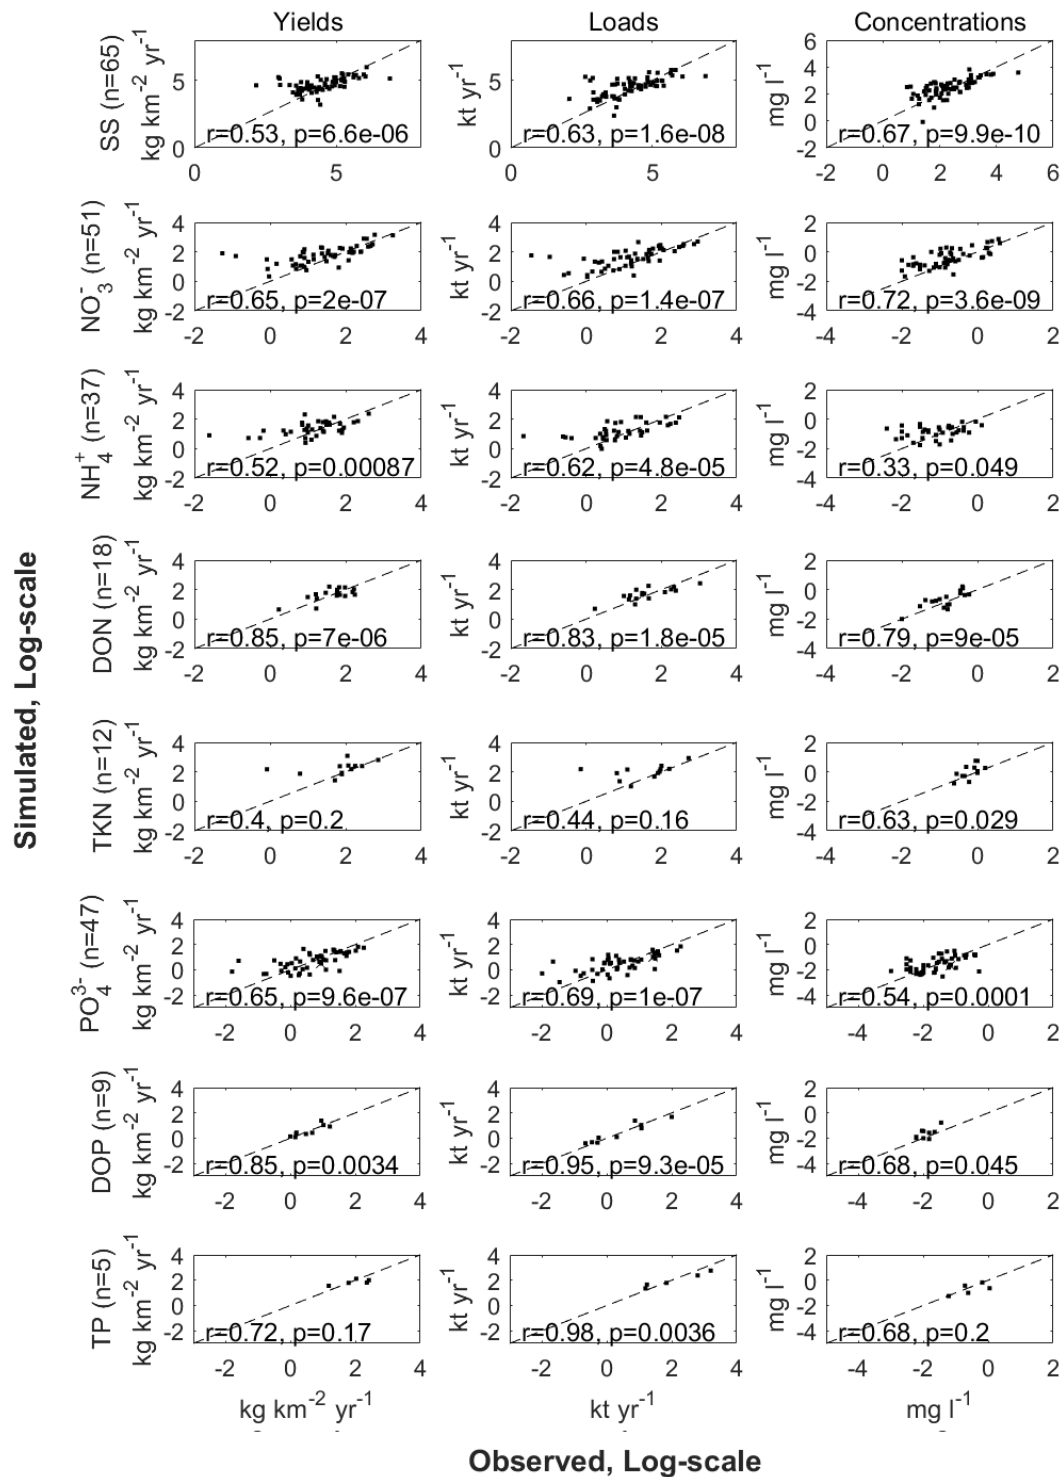

**Figure S6:** Pearson correlation coefficients ( $r$ ) and  $p$  values ( $p$ ) between the log-transformed measurement-based vs. simulated SS, N, and P yields, loads, and concentrations in different forms across the world major rivers for the year 1990. Here the actual water discharges of GEMS-GLORI were used when calculating loads and yields from the GEMS-GLORI's concentrations.

## References

Mayorga, E., Seitzinger, S. P., Harrison, J. A., Dumont, E., Beusen, A. H. W., Bouwman, A. F. Fekete, B. M., Kroeze, C., Van Drecht, G.: Global Nutrient Export from WaterSheds 2 (NEWS 2): Model development and implementation, *Environ. Model. Softw.*, 25, 837-853, 2010.

Meybeck, M. and Ragu, A.: GEMS-GLORI world river discharge database, <https://doi.org/10.1594/PANGAEA.804574>, 2012.
